# Supplementary material for: Electrospun porous lithium manganese phosphate–carbon nanofibers as a cathode material for lithium ion batteries
Source: Royal Society of Chemistry journal article supplement (doi:10.1039/c5ta03450g), 2015-01-01
Supplement: c5ta03450g1.pdf [file c5ta03450g1.pdf]

## ***Electronic Supplementary Information***

### **Electrospun porous lithium manganese phosphate–carbon nanofibers cathode material for lithium ion batteries**

Li Liu<sup>a,d, †</sup>, Taeseup Song<sup>b, †</sup>, Hyungkyu Han<sup>c</sup>, Hyunjung Park<sup>a</sup>, Juan Xiang<sup>a</sup>,

Zhiming Liu<sup>a</sup>, Yi Feng<sup>a</sup>, Ungyu Paik<sup>a, \*</sup>

*<sup>a</sup>Department of Energy Engineering, Hanyang University, Seoul 133-791, Republic of  
Korea*

*<sup>b</sup>School of Materials Science and Engineering, Yeungnam University, Gyeongsan  
712-749, Korea*

*<sup>c</sup>Department of Materials Science Engineering, Hanyang University, Seoul 133-791,  
Republic of Korea*

*<sup>d</sup> School of Chemistry, Key Laboratory of Environmentally Friendly Chemistry and  
Applications of Ministry of Education, Xiangtan University, Xiangtan 411105, China*

---

<sup>†</sup>These authors are equally contributed to this work.

\* Corresponding author: Tel: +82-2-2220-0502 Fax: +82-2-2281-0502

E-mail address: [upaik@hanyang.ac.kr](mailto:upaik@hanyang.ac.kr)

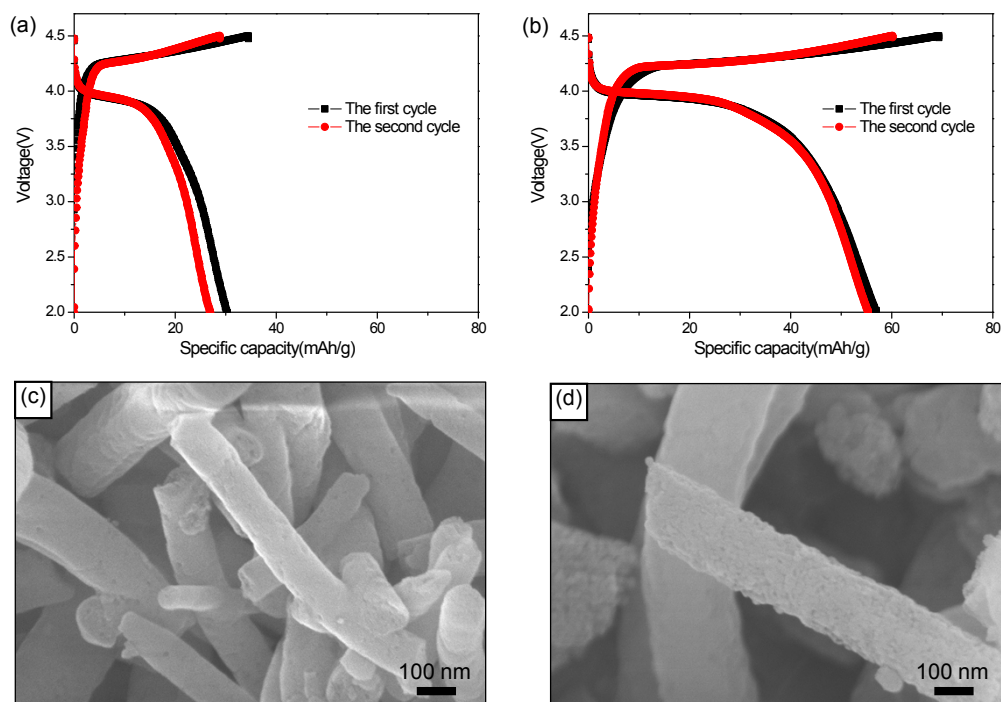

**Figure S1.** The charge-discharge curves (a, b) in initial two cycles and SEM images (c, d) of  $\text{LiMnPO}_4/\text{C}$  nanofibers obtained using PVP solution with various concentration (a, c: 0.15 g PVP in 6 mL ethanol solution; b, d: 0.45 g PVP in 6 mL ethanol solution).

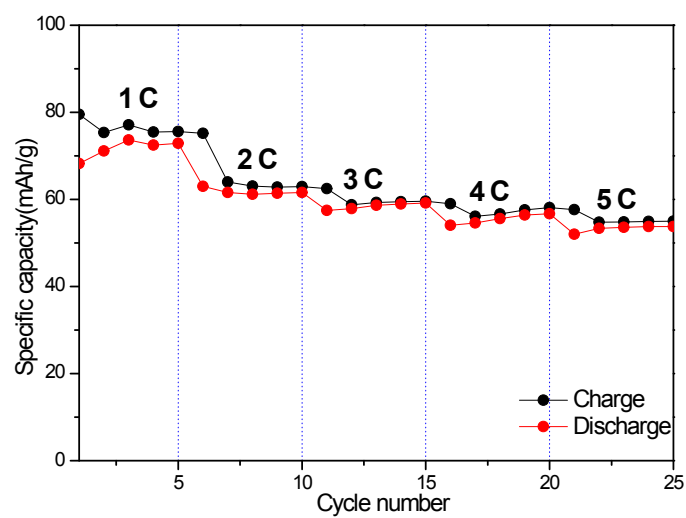

**Figure S2.** Rate performance of  $\text{LiMnPO}_4/\text{C}$  nanofibers during various discharge C-rates following a constant charge at 1 C

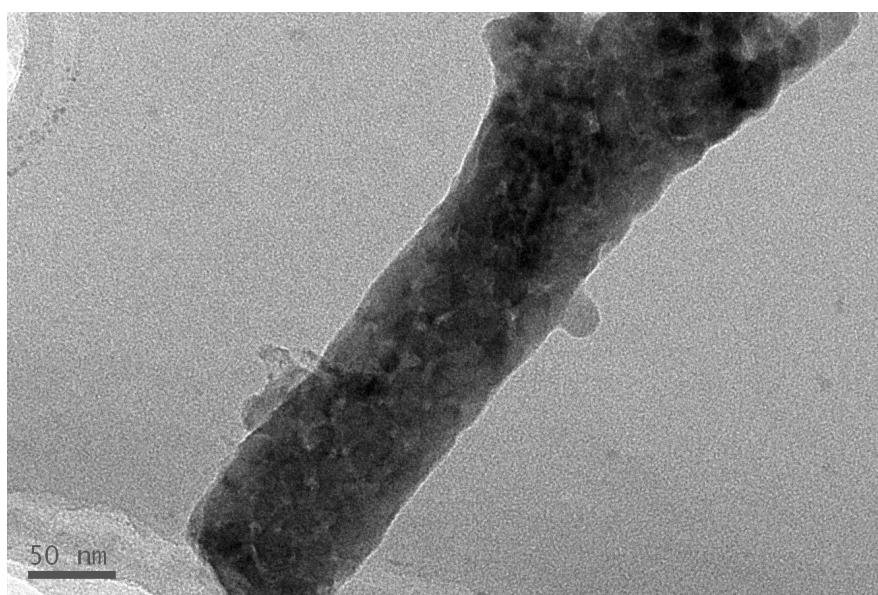

**Figure S3.** TEM image of  $\text{LiMnPO}_4/\text{C}$  nanofibers after 100 cycles at 1C
